# Supplementary material
Source: PubMed Central journal article supplement (PMC5683086)

Figure S1

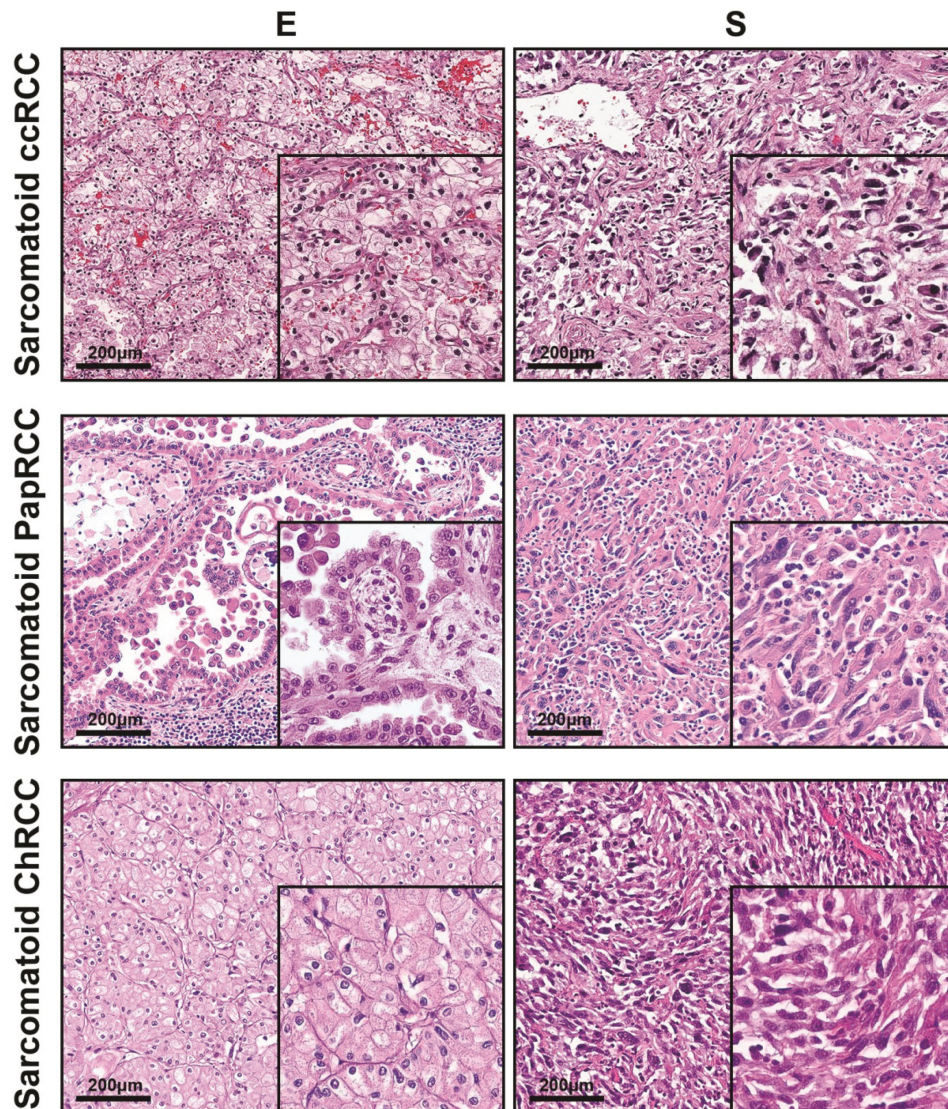

Figure S2

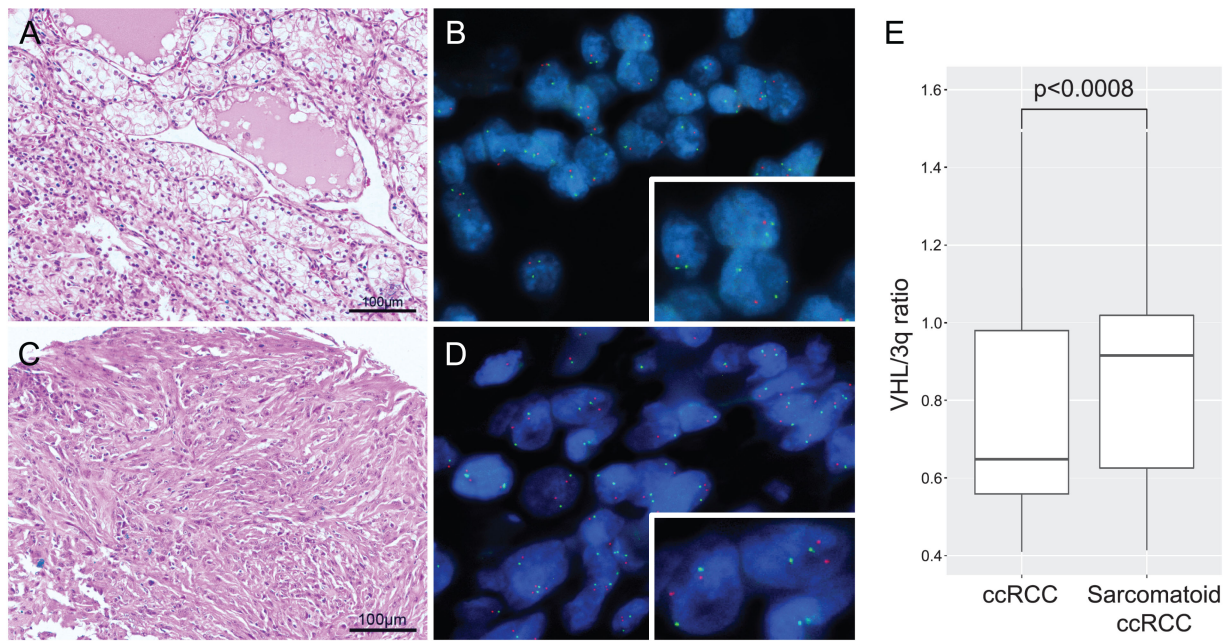

Figure S3

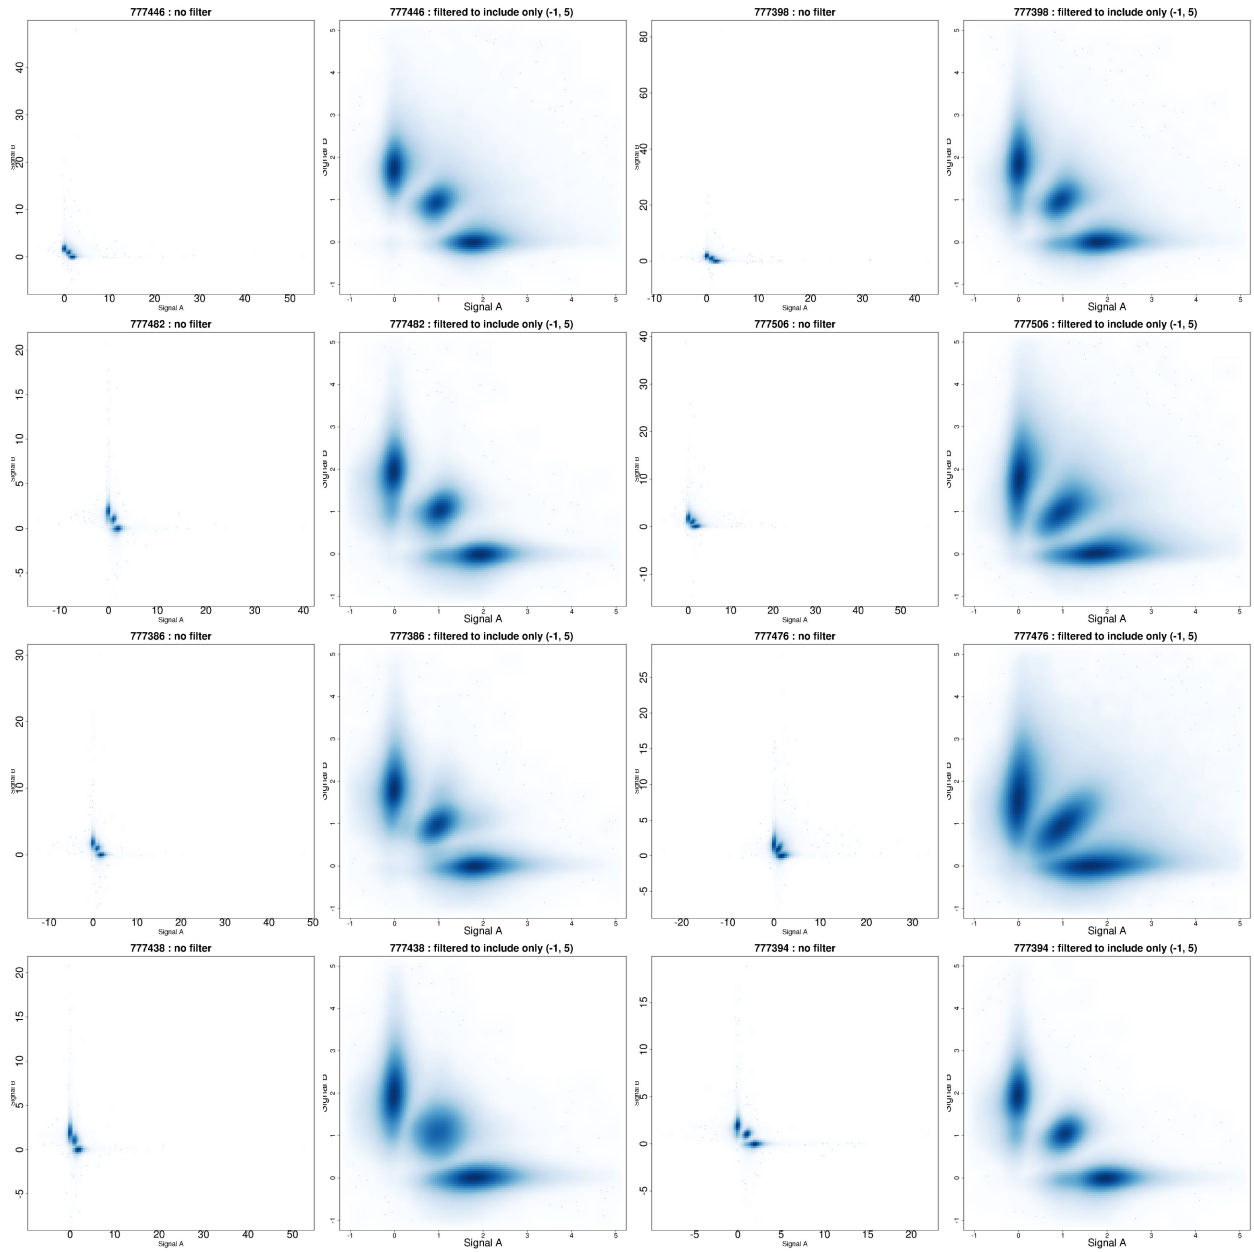

Figure S4A

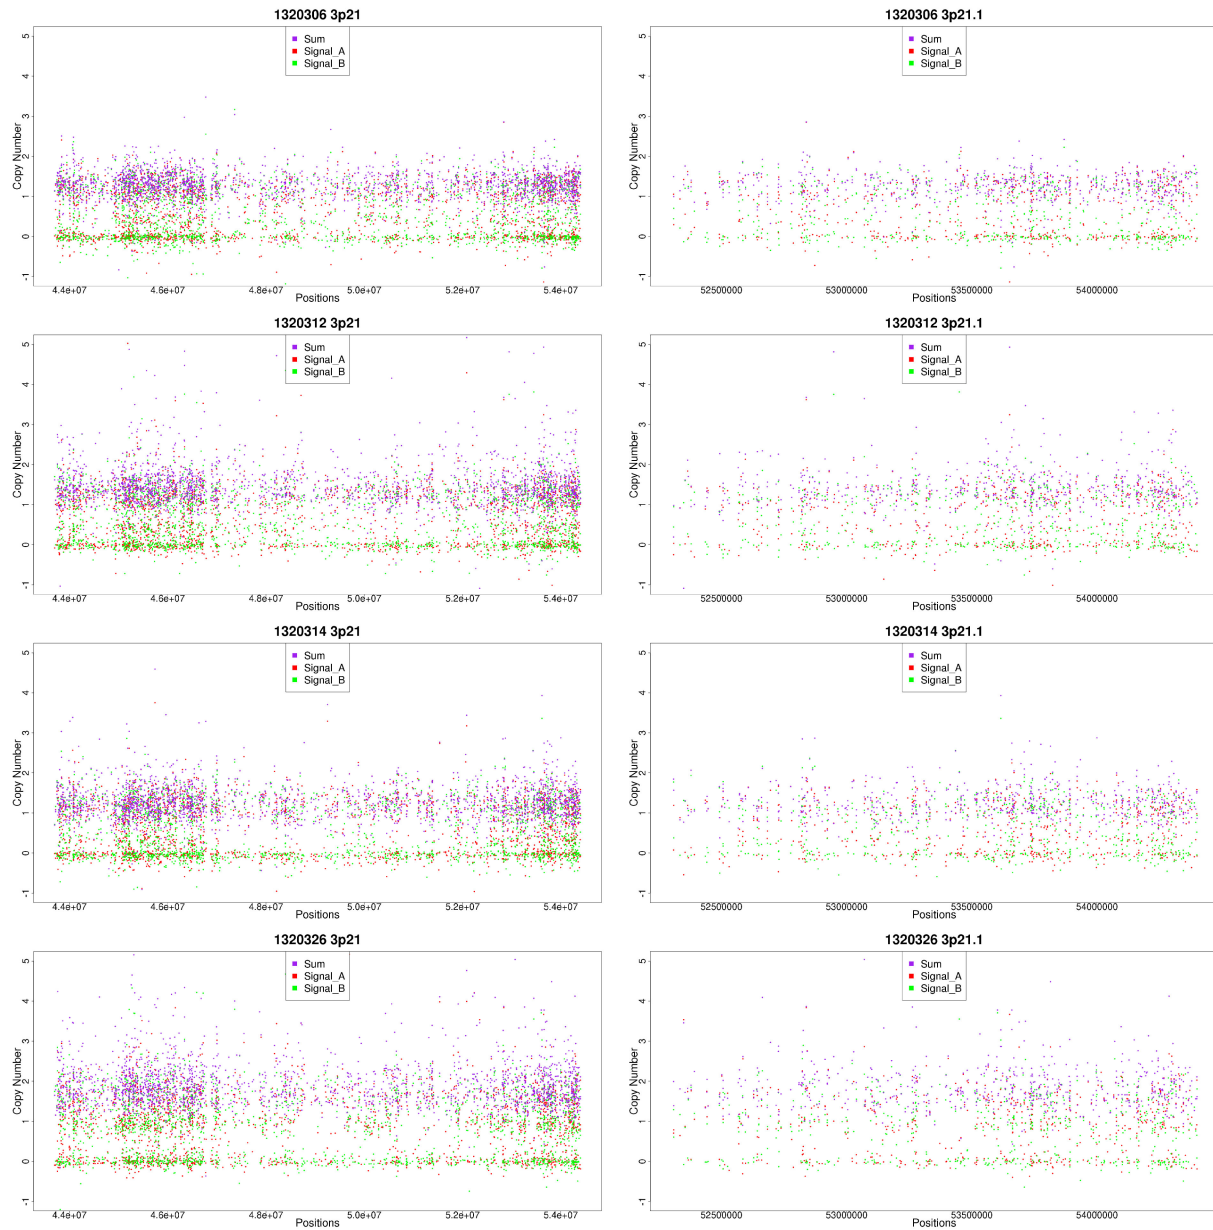

Figure S4B

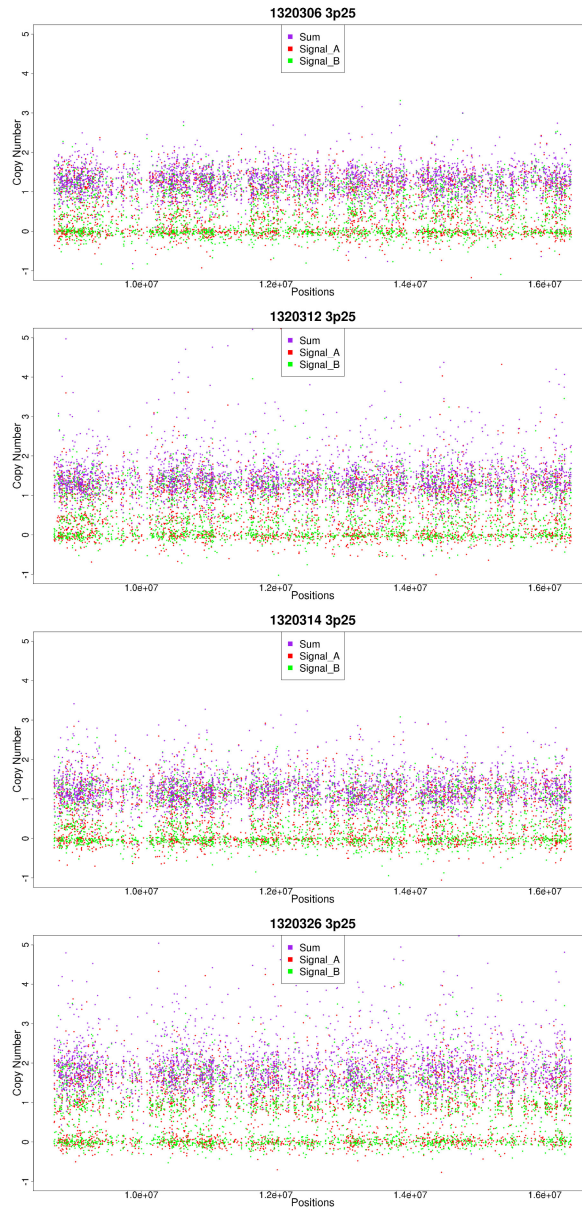

Figure S5

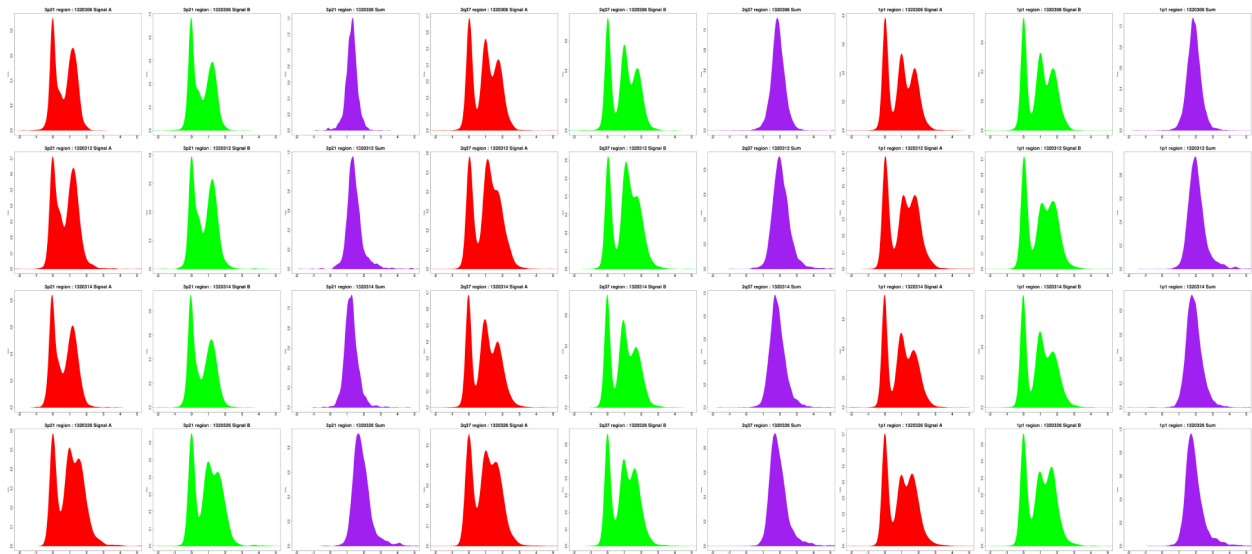

Figure S6

A

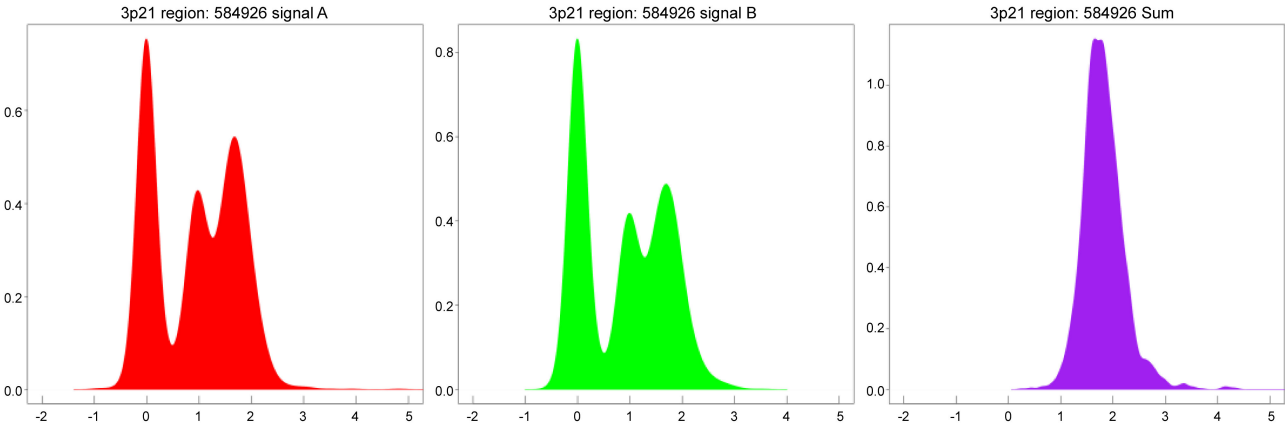

B

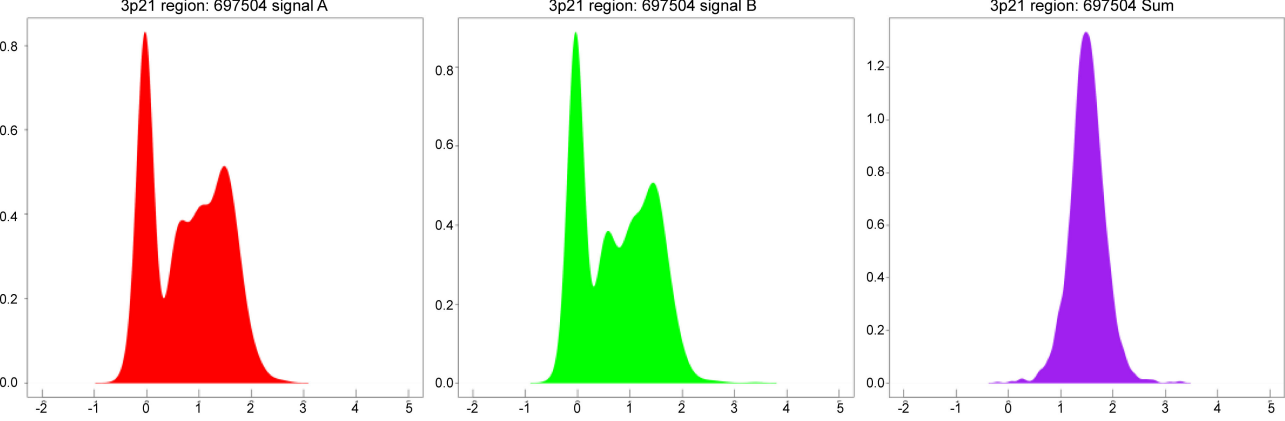

Figure S7

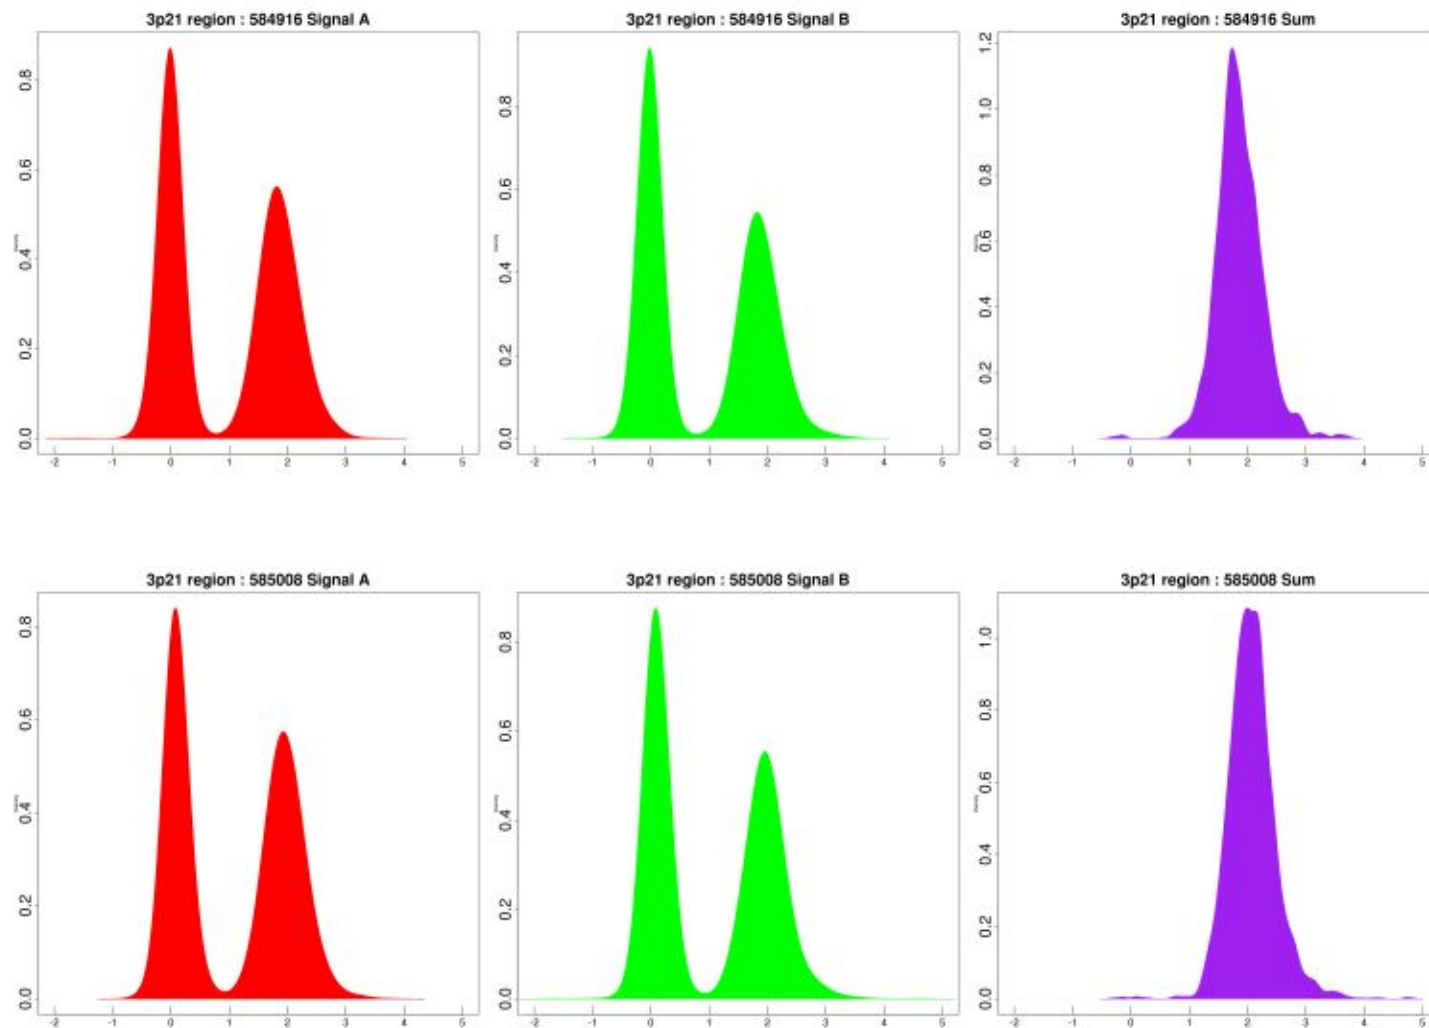



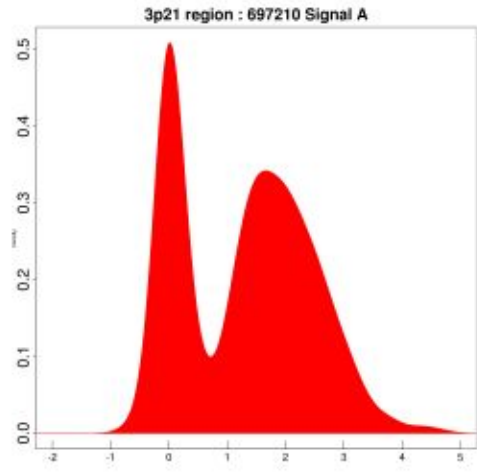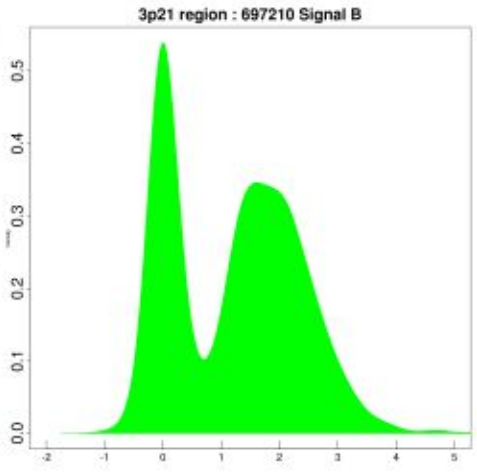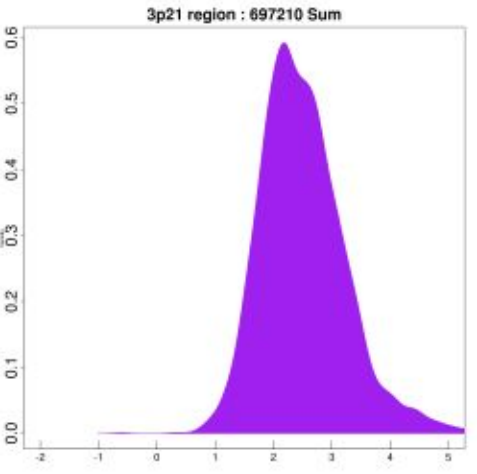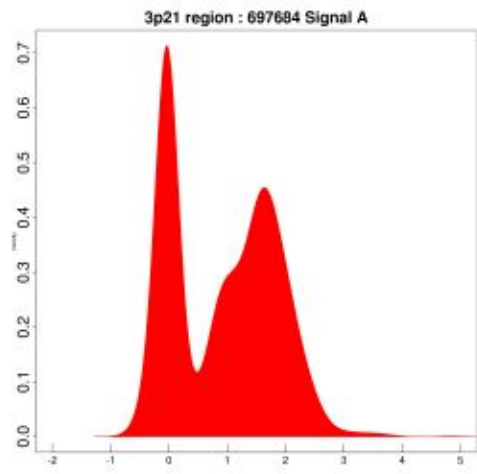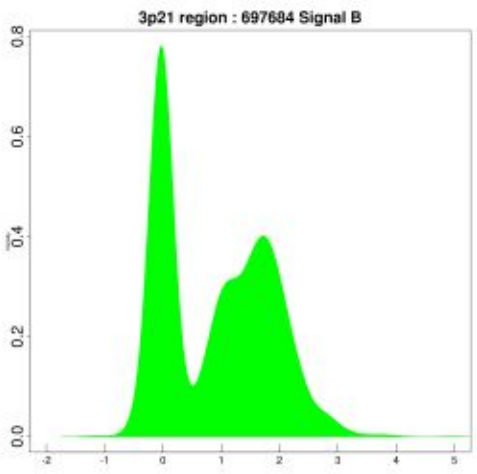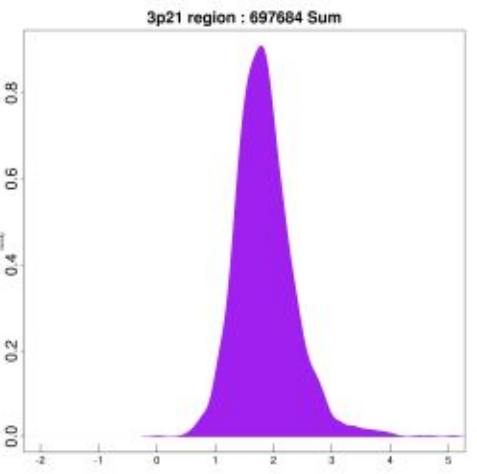

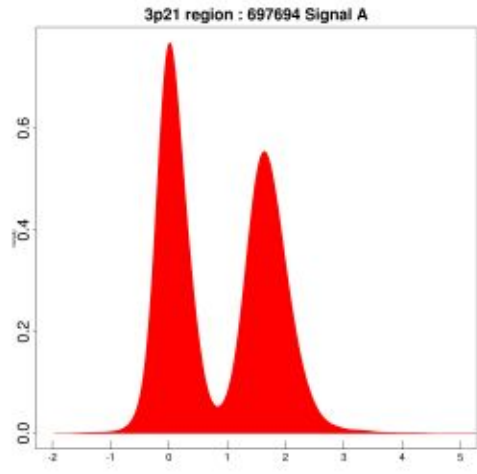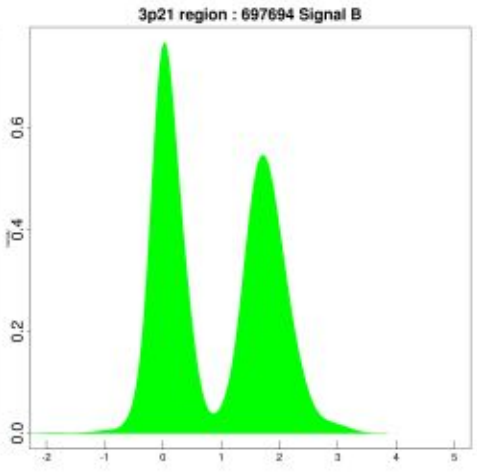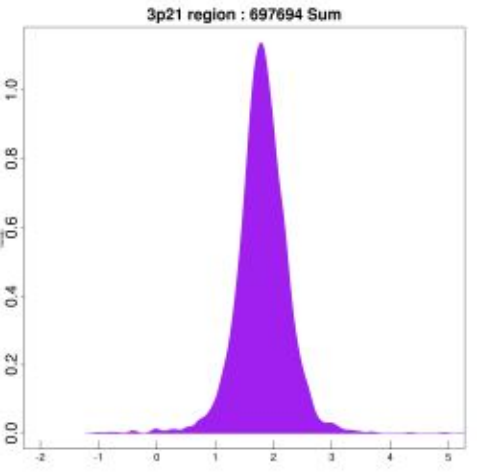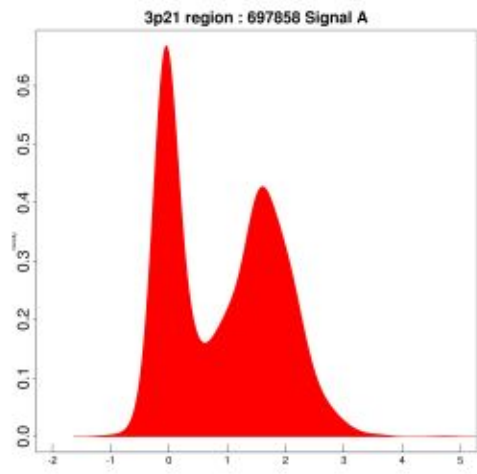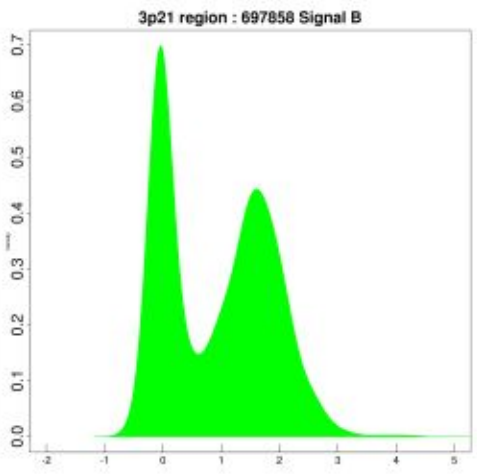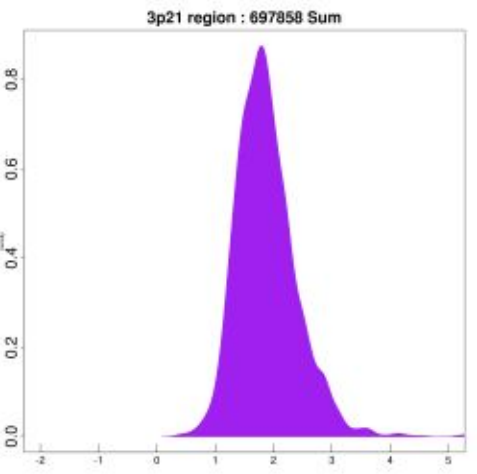

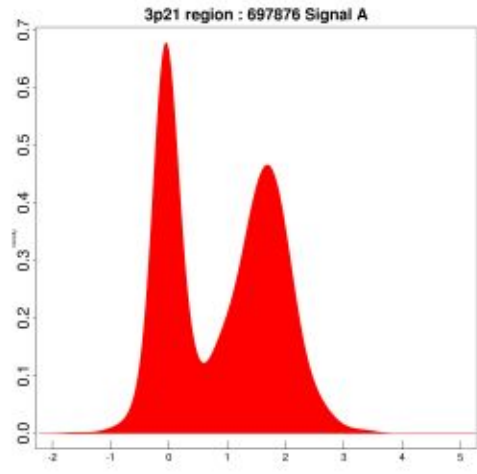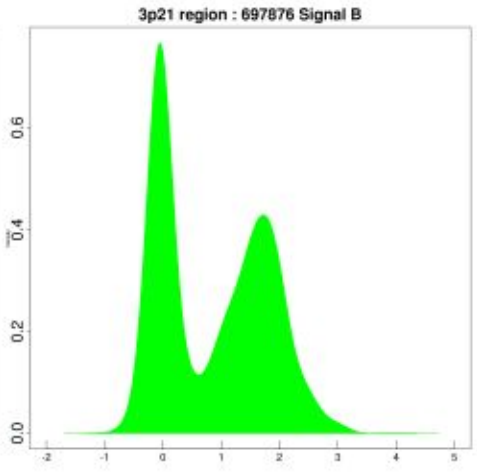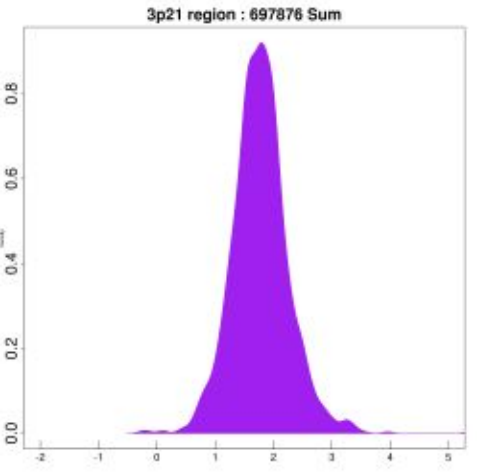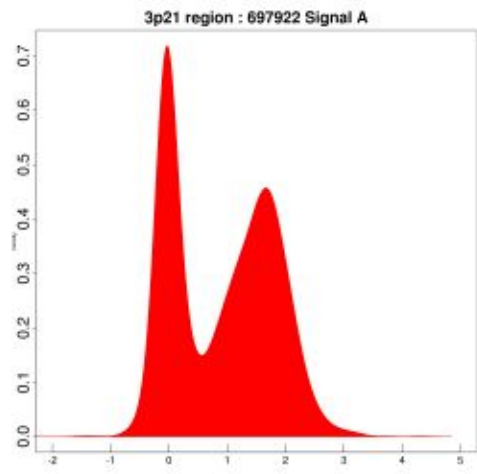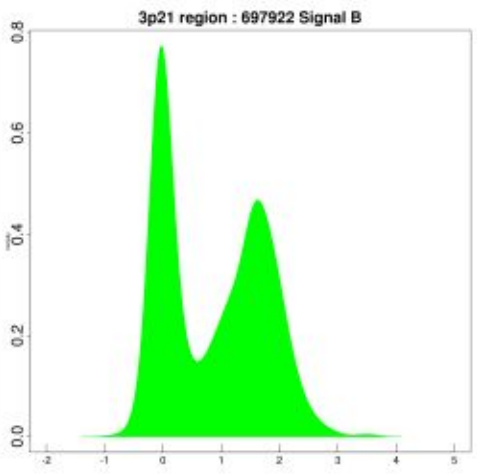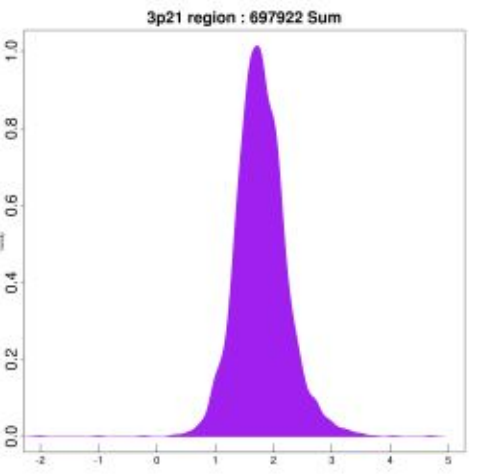

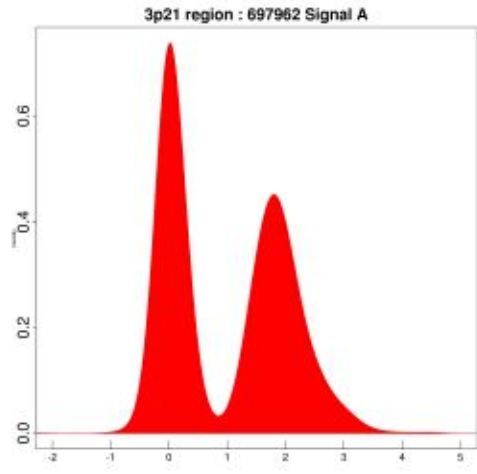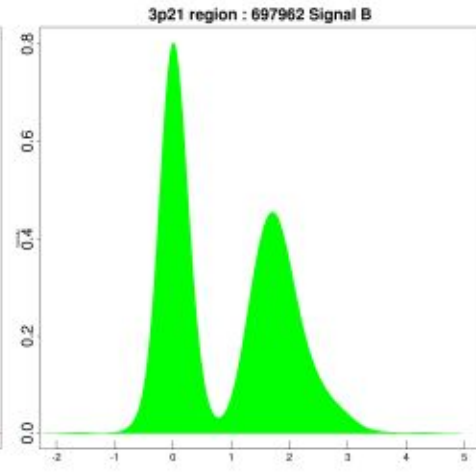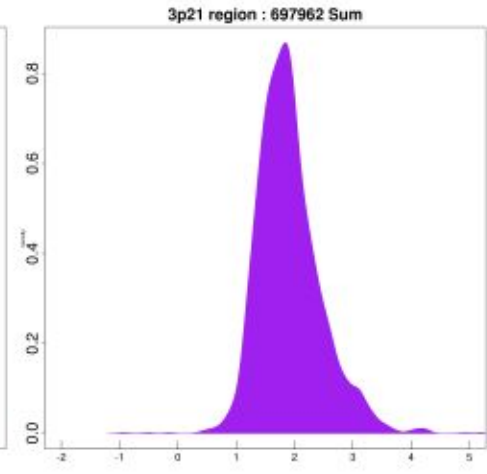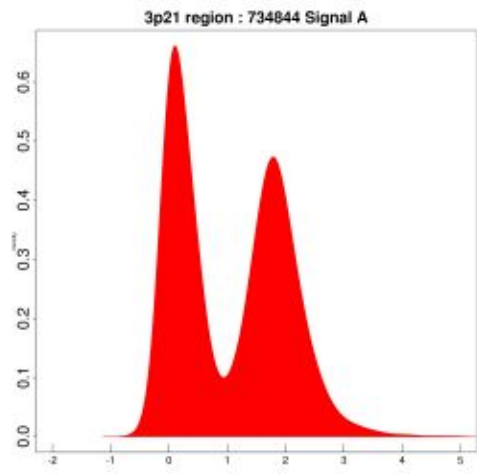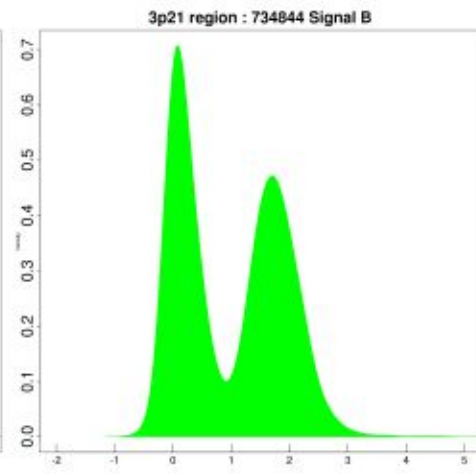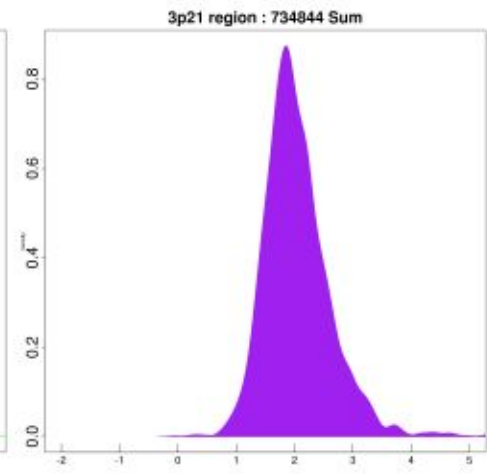

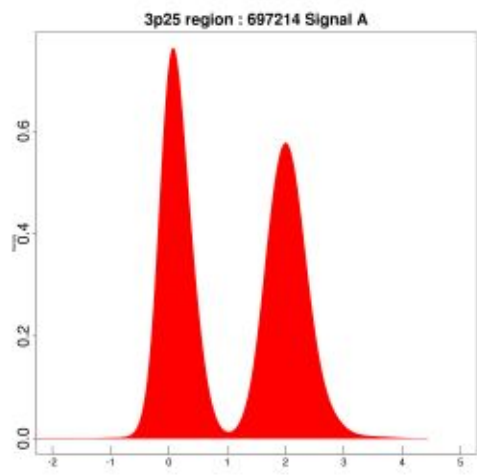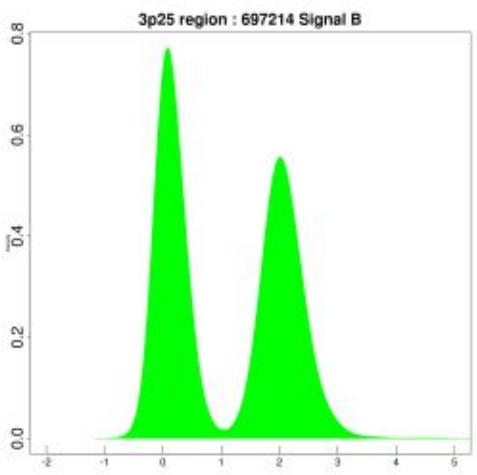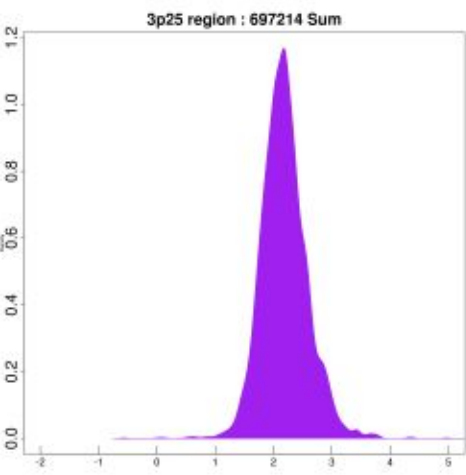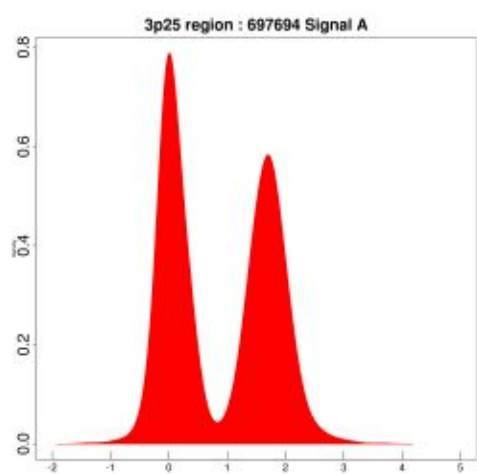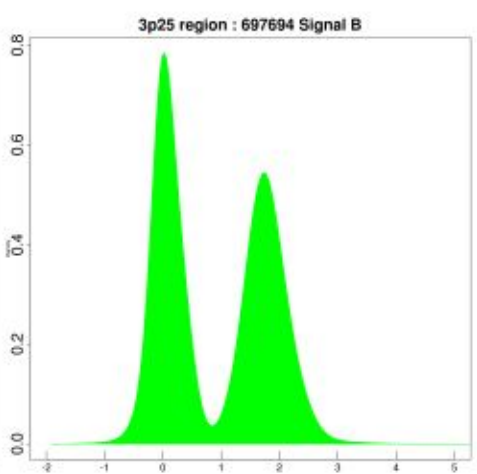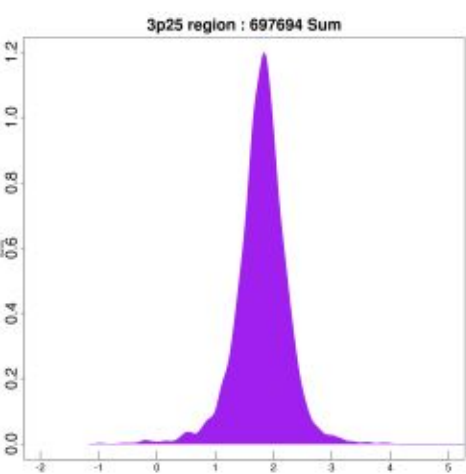

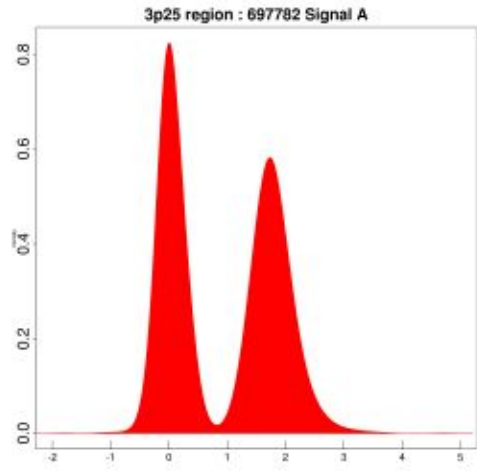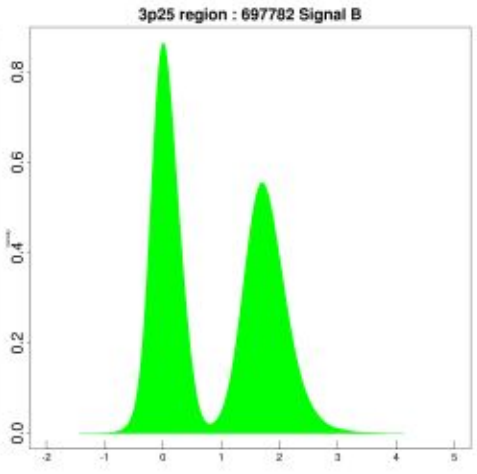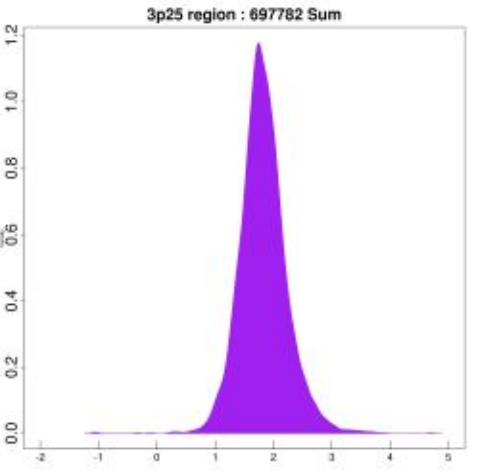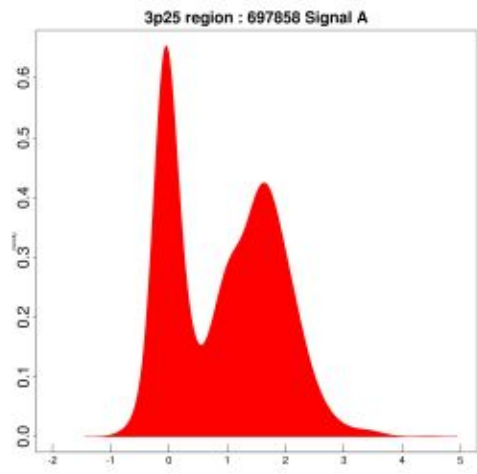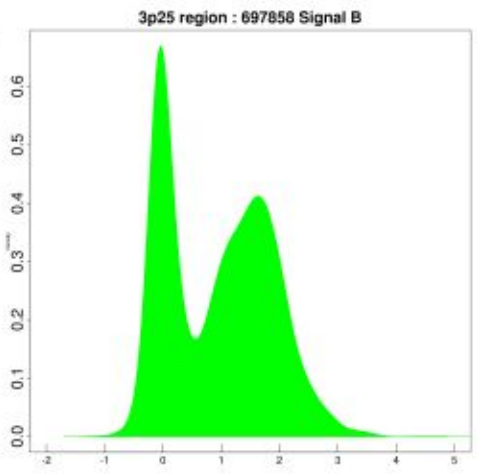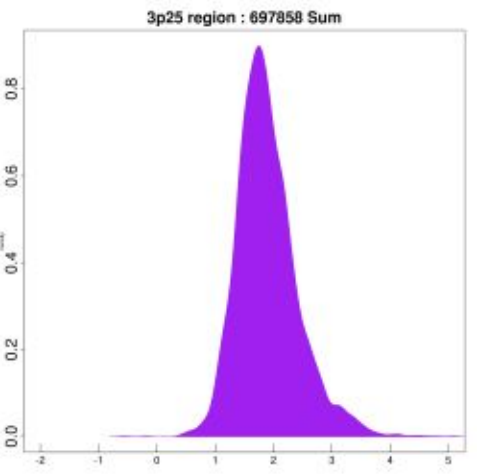

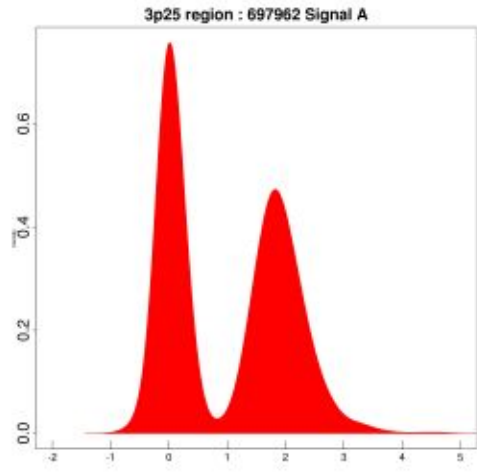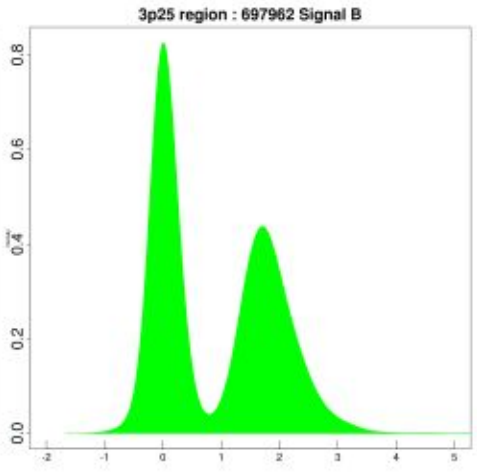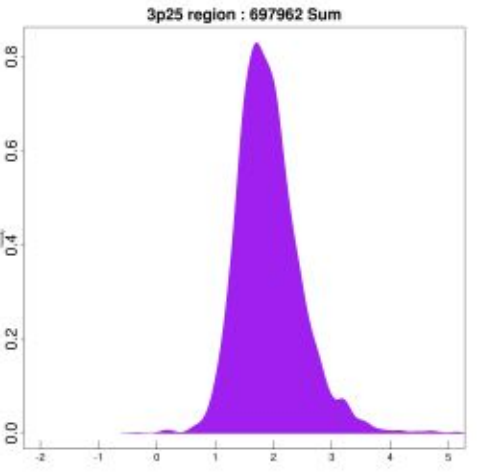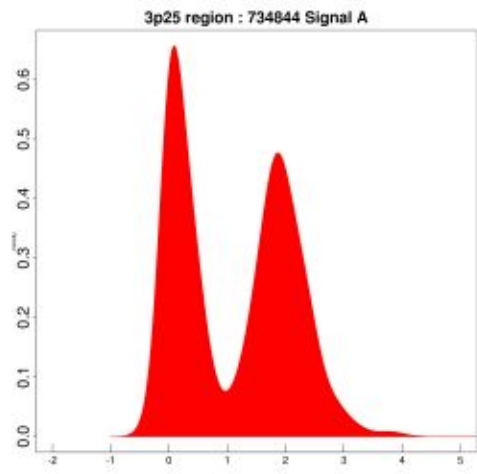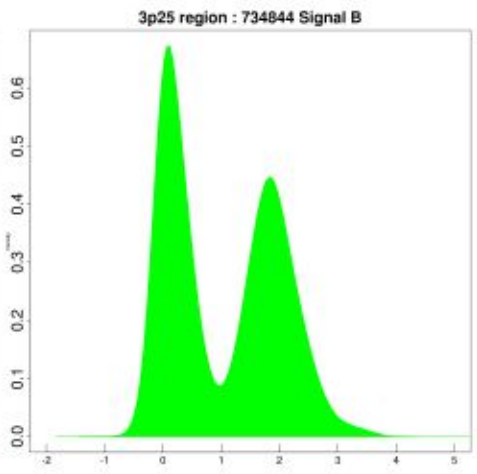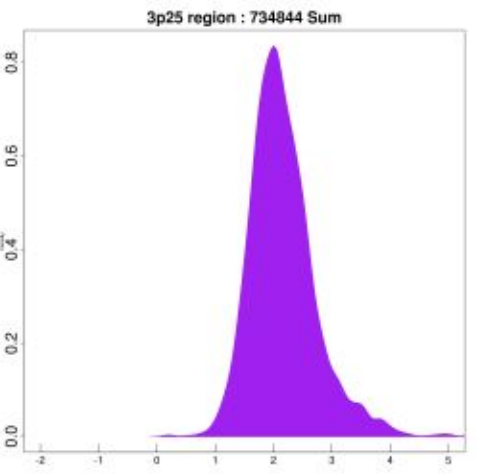

Figure S8

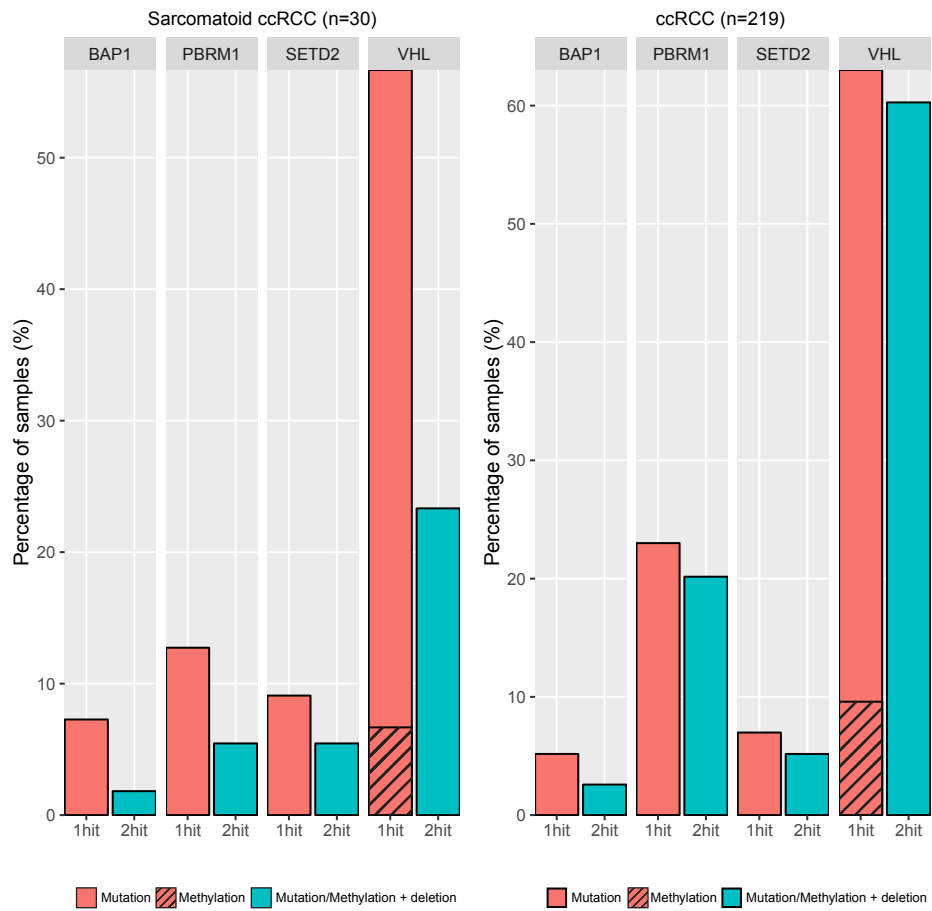



Figure S9

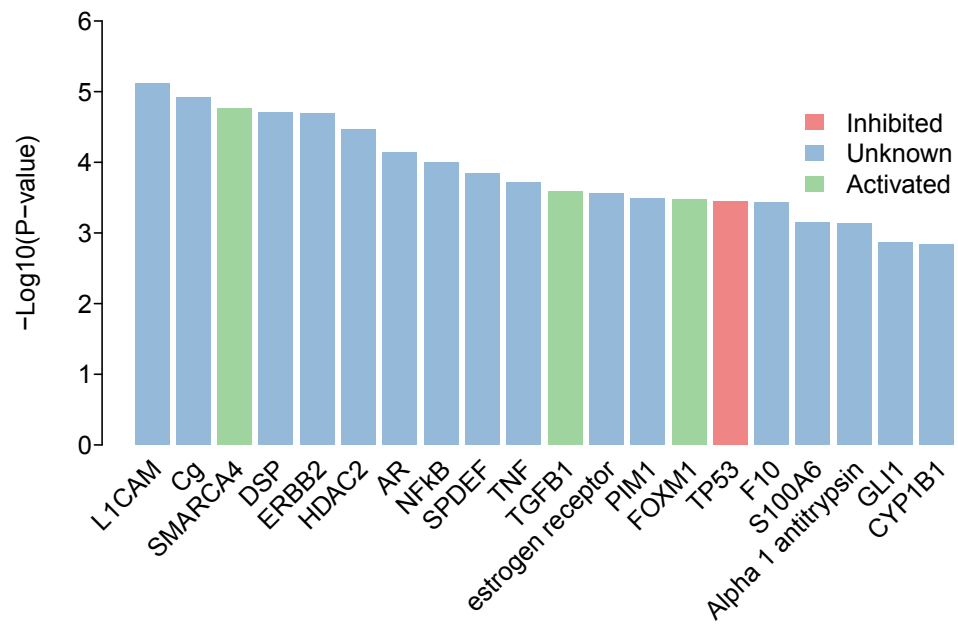

Figure S10

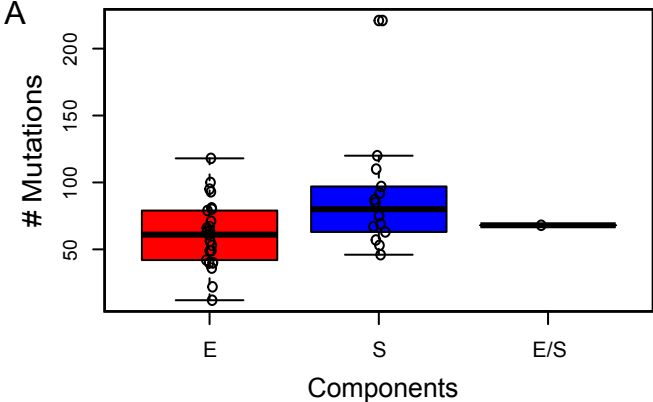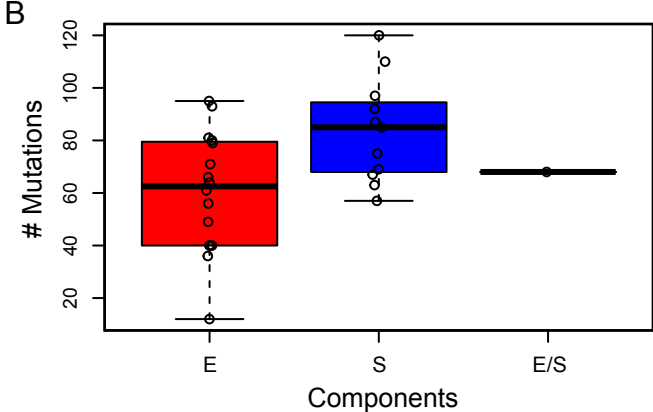

Supplement: NIHMS893399-supplement-3.pdf [file NIHMS893399-supplement-3.pdf]
